# Supplementary material
Source: PubMed Central journal article supplement (PMC2953850)
Supplement: NIHMS181062-supplement-1.pdf [file NIHMS181062-supplement-1.pdf]

## **Heterogeneity of genetic modifiers ensures normal cardiac development**

Julia B. Winston, Jonathan M. Erlich, Courtney A. Green, Ashley Aluko, Kristine A. Kaiser, Mai Takematsu, Robert S. Barlow, Ashish O. Sureka, Martin J. LaPage, Luc L. Janss, Patrick Y. Jay

### **SUPPLEMENTAL MATERIALS**

## Supplemental methods

### Segregation analyses

Two segregation models are examined by comparison of their predicted and observed incidences of a defect in the F1 and F2 crosses. Statistically significant deviation from the model was determined in a  $\chi^2$ -test by  $P < 0.05$ .

The segregation analysis models assume that a defect may occur in animals with the *Nkx2-5*<sup>+/-</sup> genotype in combination with homozygosity at one or more modifier loci. Model M1 postulates two loci *A* and *B*. C57Bl/6 and FVB/N carry the recessive, susceptibility alleles *A*<sup>-</sup> and *B*<sup>-</sup>, respectively. The penetrance of a defect in an *Nkx2-5*<sup>+/-</sup> animal are  $p_A$  for the *A*<sup>-</sup>*B*<sup>+</sup> genotype,  $p_B$  for *A*<sup>+</sup>*B*<sup>-</sup>, and  $p_{AB}$  for *A*<sup>-</sup>*B*<sup>-</sup>. If no epistatic interaction or linkage exists between *A* and *B*, then the penetrance  $p_{AB}$  for the double homozygote *A*<sup>-</sup>*B*<sup>-</sup> equals the sum of  $p_A$  and  $p_B$ . Assuming no epistatic interaction in this model,  $p_A$  and  $p_B$  are estimated from the incidences in the C57Bl/6 strain and the F2 backcross to FVB/N. The expected incidences in the F2 intercross and backcross to C57Bl/6 are calculated from equations derived from the model (Supplemental Table). Inclusion in the model of additional loci does not alter its predictions because the total effect of susceptibility alleles from one strain reduces to a single term; for example, given  $n$  loci at which C57Bl/6 carries the susceptibility alleles,  $p_A = \sum p_{A,n}$ .

Model M2 postulates multiple loci, two of which interact. Here C57Bl/6 carries the recessive susceptibility alleles at two modifier loci *A* and *B*. FVB/N carries the recessive susceptibility allele at a third locus *C*. As in model M1, the penetrances of the single homozygotes are  $p_A$ ,  $p_B$ , and  $p_C$ . The penetrance of the double homozygote *A*<sup>-</sup>*B*<sup>-</sup> is

$p_{AB}$ . The other double and triple homozygote combinations are ignored for simplicity. If  $p_A$  and  $p_B$  are negligible compared to  $p_{AB}$ , implying a synergistic interaction between  $A$  and  $B$ , then  $p_{AB}$  would approximate the incidence of the defect in C57Bl/6. The incidences attributed to the  $A^{-/-}B^{-/-}$  and  $C^{-/-}$  genotypes in the F2 backcross to C57Bl/6 and intercross are derived as shown (Supplemental Table).

### Supplemental Table

| Cross             | Model                                                                   |                                                                                    |
|-------------------|-------------------------------------------------------------------------|------------------------------------------------------------------------------------|
|                   | M1                                                                      | M2                                                                                 |
| C57Bl/6           | $p_A$                                                                   | F: $p_A + p_B + p_{AB}$<br>S: $p_{AB}$                                             |
| F1                | 0                                                                       | 0                                                                                  |
| Intercross        | F: $1/16 \times (3p_A + 3p_B + 4p_{AB})$<br>S: $1/4 \times (p_A + p_B)$ | F: $1/16 \times (3p_A + 3p_B + p_{AB} + 4p_C)$<br>S: $1/16 \times (p_{AB} + 4p_C)$ |
| C57Bl/6 backcross | $1/2 \times p_A$                                                        | F: $1/4 \times (p_A + p_B + p_{AB})$<br>S: $1/4 \times p_{AB}$                     |
| FVB/N backcross   | $1/2 \times p_B$                                                        | $1/2 \times p_C$                                                                   |

The expected incidence of a defect in a particular cross is defined by a set of equations given by the segregation model. The penetrance terms  $p_A$ ,  $p_B$ ,  $p_C$ , and  $p_{AB}$  are estimated from the incidences in the C57Bl/6 strain or FVB/N backcross, depending upon the model and term. F, full equation in which all terms described in the model are stated. S, simplified equation in which assumptions regarding the interaction term  $p_{AB}$  are made, as explained in the Supplemental Methods.
